# Supplementary material for: Bidirectional coupling of the long-term integrated assessment model REgional Model of INvestments and Development (REMIND) v3.0.0 with the hourly power sector model Dispatch and Investment Evaluation Tool with Endogenous Renewables (DIETER) v1.0.2
Source: Copernicus journal article supplement (doi:10.5194/gmd-16-4977-2023), 2023-08-31
Supplement: Supplementary file 1 [file gmd-16-4977-2023-supplement.pdf]

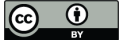

*Supplement of*

**Bidirectional coupling of the long-term integrated assessment model  
REgional Model of INvestments and Development (REMIND) v3.0.0 with  
the hourly power sector model Dispatch and Investment Evaluation Tool  
with Endogenous Renewables (DIETER) v1.0.2**

**Chen Chris Gong et al.**

*Correspondence to:* Chen Chris Gong ([chen.gong@pik-potsdam.de](mailto:chen.gong@pik-potsdam.de))

The copyright of individual parts of the supplement might differ from the article licence.

## **Supplemental materials for “Bidirectional coupling of a long-term integrated assessment model with an hourly power sector model”**

### **S1: Model input data**

#### S1-1: Description of model data

The relevant REMIND exogenous input data consists mainly of technological costs, estimated technology learning rate, standing capacities, total VRE and hydro potential, projections of possible future demographic and economic developments. Historical data for the year 2005 is used to calibrate most of the free variables (e.g. primary energy and secondary energy mixes, as well as standing capacities and traded goods). A full list of input data and their sources can be found in (Baumstark et al., 2021). Notably, resource constraints are taken into consideration, such as the limited nature of fossil fuel and biofuel as well as the limited potential for solar, wind and hydro in a given region in terms of total available potential, capacity factor as well as proximity to demand centers.

We obtain the exogenous DIETER hourly time series input data from the Open Power System Data platform, which collects and provides European electricity market data from official sources (Data Platform – Open Power System Data, 2022). Input parameters consist of hourly time series of German electricity demand, as well as the hourly capacity factor of solar PV, onshore and offshore wind power, defined between zero and one. Both are from the historical year 2019.

The heating and cooling demand (final energy) in REMIND (baseline scenario) is calculated based on annual degree days which in turn is based on gridded daily temperature data from Global Soil Wetness Project Phase 3 (GSWP3) in the ISIMIP project (Warszawski et al., 2014). This calculation is carried out in an energy demand model for buildings “EDGE-B” (Levesque et al., 2018) then fed into REMIND. In this calculation we assume constant climate from now on into the future. Specifically, the average of the year 2006-2010 is used for future data on annual degree days.

As researchers designing global energy climate models, we pay special attention to the openness of our models and data. It is becoming increasingly clear that climate impact and also to a large degree climate mitigation research literature suffers from an “attribution gap” (Callaghan et al., 2021; Sgambatti Monteiro et al., 2021), where researchers based in the global south contribute much less to the academic literature. This can be due to a number of factors, and one among them is the high initial cost of investment into climate mitigation and energy transition research, including cost for data access or data collection, cost for purchasing firmwares required by the models and cost for institutional access for academic publishing. The models used in our study are either “partially open” in the case of REMIND, where only certain input data are not freely available, or “fully open” in the case of DIETER, where input data and source-code are freely available. In both cases firmware solvers are used to achieve optimal performances, although in the case of DIETER, there exist also open-sourced free solvers such as Gurobi. Both models are implemented in the General Algebraic Modeling System (GAMS).

S1-2: Costs of various selected technologies.

| Technology          | Year | Overnight capital cost (2005\$/kW) | O&M fixed cost (2005\$/kW) | O&M variable cost (2005\$/MWh) | Learning rate |
|---------------------|------|------------------------------------|----------------------------|--------------------------------|---------------|
| Solar PV            | 2020 | 564                                | 11.3                       | 0                              | 20.7%         |
|                     | 2045 | 219                                | 4.4                        | 0                              |               |
| Wind Onshore        | 2020 | 1343                               | 26.9                       | 0                              | 10.8%         |
|                     | 2045 | 1134                               | 22.5                       | 0                              |               |
| Wind Offshore       | 2020 | 4134                               | 12.4                       | 0                              | 10.8%         |
|                     | 2045 | 1946                               | 52.3                       | 0                              |               |
| Lithium-ion battery | 2020 | 573                                | 0.2                        | 0.3                            | 15%           |
|                     | 2045 | 367                                | 0.1                        | 0.3                            |               |
| Electrolyzers       | 2020 | 1041                               | 52                         | 0.3                            | 15%           |
|                     | 2045 | 428                                | 21                         | 0.3                            |               |

**Table S1: Costs of various selected technologies.**

Overnight capital costs are drawn from various sources (IEA, 2016; Lazard, 2019; IEA, 2019, 2020; De Vita et al., 2018; Strefler et al., 2021; IEA PVPS, 2020; Schmidt et al., 2019; Reuß et al., 2017). O&M fixed costs are usually a fixed fraction of the overnight capital cost. The interest rate is endogenously determined in REMIND and is usually around 4% to 5%. Learning rates of technologies are endogenously given in REMIND.

Technological learning takes place globally. Due to high learning rates of these alternative energy technologies, the floor costs (i.e. the lower bound on learned costs) are usually reached well before 2045

**S2: Model results**

Price duration curves (PDCs) are obtained by sorting the hourly electricity price time series. They help identify the price distribution in a year of a future decarbonized power market of a high VRE share.

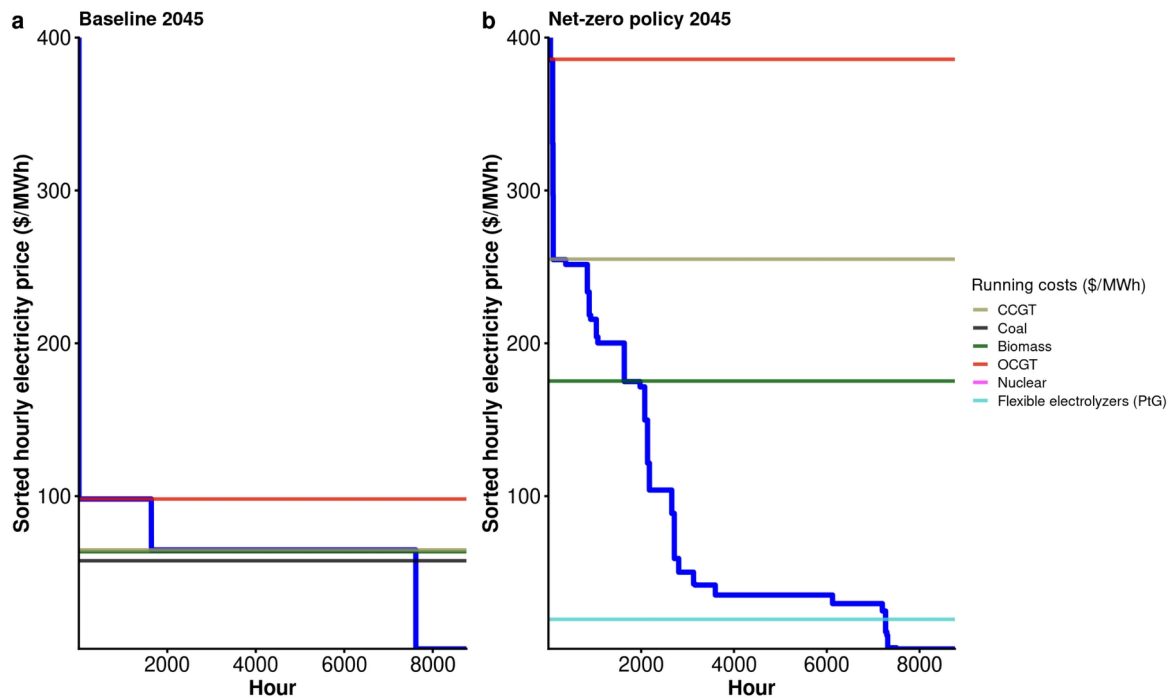

**Figure S1: Side-by-side comparison of PDCs (thick dark blue lines) between (a) baseline without storage or flexible demand, and (b) net-zero by 2045 scenario with storage and flexible demand. Horizontal lines are color coded for the running cost of various generation or flexible demand-side technologies.**

Under baseline without storage or flexible demand (Fig. S1a), because variable generations have close-to-zero running costs, the hourly prices where these generations can meet all of inflexible demand are zero. Without storage, as the generation shares of renewables increases, the number of zero-price hours increases but only to a degree, since for the remaining times of the year in Germany the renewable generation cannot fully meet the demand, leaving CCGT and biomass to set the price of the hours for the majority of the year, at a moderately low level around \$65/MWh.

In the Net-zero scenario with storage and flexible demand (Fig. S1b), the shape of PDC is drastically changed. The implementation of storage decreases the number of zero-price hours, and lowers the average annual prices. For around two thirds of the year, the price is at a low level below \$50/MWh. However, the distribution of prices under such high shares of renewables looks drastically different – for around 2000 hours, the prices are higher than \$100/MWh, and for several hundred hours (around a month) the prices are above \$200/MWh. The remaining dispatchable generation such as CCGT with carbon capture and storage (CCS) and biomass act as price-setting in fewer hours, but at much higher prices due to the low capacity factors of these plants (around 200~300\$/MWh). For a few hours of the year OCGT is price-setting at close to 400\$/MWh. Notably, electrolysis runs on a rather low annual average electricity price (lower than 30\$/MWh) due to its complete flexibilization.

### **S3: Coupled run when brown-field constraint is not present in DIETER**

Removing standing capacity constraint in coupled DIETER reveals the distortion in DIETER from REMIND, had there been no brown-field constraints. Removing this constraint reduces the degree of convergence not just

in near-term but also in more “green-field” periods such as in the 2050s and 2060s. In order to demonstrate this, we have conducted an additional experiment, where all the setup of soft-coupling remains the same as before in Sec. 4, except that the “brown-field” constraints in DIETER are removed (Fig. S2).

There are some obvious mismatches in the coupling here if most of the quantities are not being exchanged. The first mismatch is for the 2020-2030 period, especially, brown-field and near-term constraints are implemented in REMIND, but these constraints are not identical in DIETER. The best estimate from DIETER of the mix is based purely on a rather low CO2 price, where by this information alone it seems to vastly underestimate existing wind generation. The second one is the total absence of hydroelectric generation after 2030. This is likely due to the long life-time of these plants (~100 years), which already exist in Germany. In REMIND, the brown-field constraints mean that the model gets the plants “for free”. In DIETER, not seeing this “free standing capacity”, does not see an economic case for hydro due to its high cost compared to other generators (see Fig. 7(a)), leading to distortions also in the medium and long-term of the cost-value structure. The slightly higher electricity price of REMIND in the medium to long term encourages more solar deployment, because its lower cost is on average more competitive. This is in line with what we observed in Fig. 4-5 where REMIND tends to have higher solar shares than DIETER.

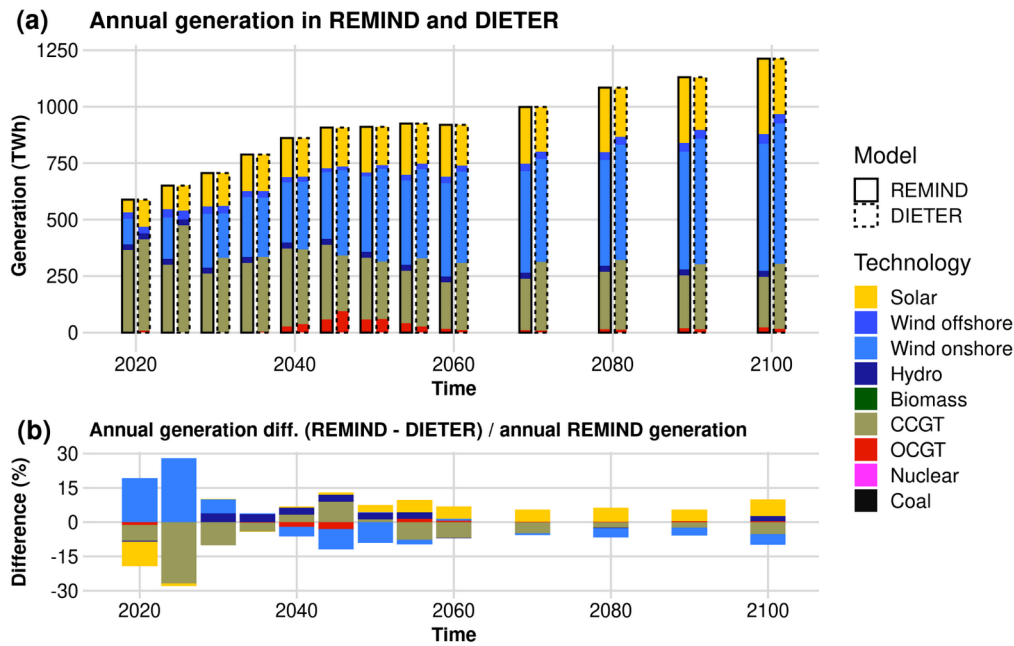

**Figure S2: Generation mix at final iteration of a coupled run where standing capacity constraint (c8) in DIETER is removed. No additional change in configuration from the baseline run presented in Sec. 4 is implemented. (a) Side-by-side comparison of the two models' generation portfolio at the end of the coupled run. (b) The difference between the two models as a share of total generation. Due to the large discrepancies in early years, the convergence criteria is removed from the algorithm, such that the coupled run halts as soon as REMIND internal Nash iterations converge. (Wind offshore capacity is still fixed, so excluded from this experiment.)**

#### S4: Comparison to other published Germany net-zero 2045 scenarios

For net-zero scenarios, one of the most up-to-date model comparisons using state-of-the-art models for Germany is the report of the flagship project “Ariadne” funded by the German ministry for Education and Research (BMBF) (Ariadne Project, 2022). The modeled results in our paper are closest to the “Ariadne-REMIND-Mix” scenario for net-zero Germany (using uncoupled REMIND), and to the “Ariadne-REMod-Mix” (using the energy system model REMod). However, some differences remain, which we explain below.

For generation and capacity of solar, onshore wind and offshore wind in 2045, the following comparison can be made:

| Generation (2045)   | solar PV (TWh) | wind onshore (TWh) | wind offshore (TWh) | total (TWh) |
|---------------------|----------------|--------------------|---------------------|-------------|
| this study (Fig 10) | 600            | 592                | 92                  | 1344        |
| Ariadne-REMIND-mix  | 325            | 582                | 114                 | 1100        |
| Ariadne-REMOD-mix   | 473            | 545                | 360                 | 1487        |

**Table S2: Comparison of generations in 2045 between our study and scenarios from Ariadne project.**

| Capacity (2045)    | solar PV (GW) | wind onshore (GW) | wind offshore (GW) |
|--------------------|---------------|-------------------|--------------------|
| this study         | 750           | 232               | 28                 |
| Ariadne-REMIND-mix | 329           | 218               | 29                 |
| Ariadne-REMOD-mix  | 456           | 216               | 75                 |

**Table S3: Comparison of capacities in 2045 between our study and scenarios from the Ariadne project.**

Compared to uncoupled REMIND, the largest difference can be observed for total generation, solar PV capacity and solar PV generation. This is likely due to the fact that uncoupled REMIND only has parametrized power sector investment and dispatch, so the electricity price is higher than in coupled REMIND, where the price is calculated via iteration with DIETER. Lower electricity prices in REMIND incentivizes more power usage. Since power is more competitive compared to other types of energy carriers, total generation is higher in the coupled version in our paper than “Ariadne-REMIND-Mix” which uses uncoupled REMIND. This could be due to the fact that in the uncoupled REMIND, solar PV is parametrized to be integrated at higher cost than in DIETER, where solar generation is explicitly modeled. Another reason could be due to the fact that solar is the cheapest form of electricity in the model per unit generation, as total power demand increases, solar PV is

disproportionately used more. This is why we observe more solar in the coupled version than in the uncoupled version. For reference, REMod, which is an hourly resolution energy system model, has results which differ with both coupled and uncoupled versions of REMIND, mostly in offshore wind. This difference likely comes from different assumptions about technology cost and resource availability as well as modeling approaches between REMIND and REMod. However, the metrics are broadly consistent and also comparable to other models in the Ariadne project report.

#### S5: Technical specifications of typical PSMs

| <b>Model name and version</b>                                | <b>PyPSA-Eur</b>                                                                | <b>DIETER v1.3.1</b>                                                     | <b>LUT-ESTM</b>                                                                         | <b>GenX</b>                                                                      | <b>REMod</b>                                                                         |
|--------------------------------------------------------------|---------------------------------------------------------------------------------|--------------------------------------------------------------------------|-----------------------------------------------------------------------------------------|----------------------------------------------------------------------------------|--------------------------------------------------------------------------------------|
| Spatial scope                                                | Europe                                                                          | Europe (9 countries)                                                     | Regional and global                                                                     | U.S. / non-specific                                                              | Germany                                                                              |
| Planning horizon                                             | 1 year                                                                          | 1 year                                                                   | 1 year                                                                                  | 1 year                                                                           | 1 year                                                                               |
| Temporal resolution                                          | hourly                                                                          | hourly                                                                   | hourly                                                                                  | hourly                                                                           | hourly                                                                               |
| Spatial resolution                                           | Subnational and national (37-512 nodes)                                         | Subnational and national (central Europe)                                | Subregional and regional (multi-nodal)                                                  | Subregional and regional (multi-nodal)                                           | Single node                                                                          |
| Sectoral scope                                               | Power sector + selected demands from transport, building, industry, agriculture | Power sector + selected demands from transport, building, industry       | Power and gas + selected demands from transport, building, industry, water desalination | Power sector                                                                     | Power, gas and heat network, biomass, fossil fuels + demands from building, industry |
| Transmission assumption                                      | Transmission within and between countries                                       | Transmission between countries                                           | Transmission within and between countries                                               | Transmission between regions                                                     | Transmission within country                                                          |
| Transmission network detail                                  | Non-linear/ Linear Power Flow, NTC                                              | none (NTCs)                                                              | none                                                                                    | AC power flows                                                                   | none                                                                                 |
| Storage technologies                                         | Batteries, Hydrogen, Pumped Hydro Storage, Power-to-Gas, Thermal Storage        | Batteries, Hydrogen, Pumped Hydro Storage, Compressed Air Energy Storage | Batteries, Thermal Energy Storage, Pumped Hydro Storage, Gas Storage                    | Hydro reservoir and pumped-storage hydroelectric generator, other energy storage | Batteries, Thermal Energy Storage, Pumped Hydro Storage, Gas Storage                 |
| Technologies for demand-side flexibilities / sector-coupling | Vehicle-to-grid, Power-to-Heat, Hydrogen, Heat pumps, Electric heaters          | Vehicle-to-grid, Power-to-Heat, Hydrogen, Heat pumps, Electric heaters   | Vehicle-to-grid, Power-to-Heat, Hydrogen, Heat pumps, Electric heaters                  | Aggregated flexible demand                                                       | Power-to-Gas, Power-to-Heat, Heat pumps                                              |

|            |                                         |                                                    |                                               |                             |                                                                                    |
|------------|-----------------------------------------|----------------------------------------------------|-----------------------------------------------|-----------------------------|------------------------------------------------------------------------------------|
| References | Brown et al., 2017; Hörsch et al., 2018 | Zerrahn and Schill, 2017; Schill and Zerrahn, 2018 | Bogdanov and Breyer, 2016; Child et al., 2019 | Jenkins and Sepulveda, 2017 | Palzer and Henning, 2014(a); Palzer and Henning, 2014(b); Henning and Palzer, 2014 |
|------------|-----------------------------------------|----------------------------------------------------|-----------------------------------------------|-----------------------------|------------------------------------------------------------------------------------|

**Table S4: Comparison of model specifications for a few selected PSMs. More PSM specification comparisons can be found in e.g. Ringkjøb et al. 2018 or Prina et al. 2020.**

## References

- Ariadne Project, Die „Big 5“-Szenarien zur Klimaneutralität im Vergleich: Übersichtspapier: [https://ariadneprojekt.de/media/2022/03/2022-03-16-Big5-Szenarienvergleich\\_final.pdf](https://ariadneprojekt.de/media/2022/03/2022-03-16-Big5-Szenarienvergleich_final.pdf), 2022. Last access: 16 April 2023.
- Data Platform – Open Power System Data: [https://data.open-power-system-data.org/renewable\\_power\\_plants/2017-02-16](https://data.open-power-system-data.org/renewable_power_plants/2017-02-16), last access: 22 January 2022.
- Baumstark, L., Bauer, N., Benke, F., Bertram, C., Bi, S., Gong, C. C., Dietrich, J. P., Dirnaichner, A., Giannousakis, A., Hilaire, J., Klein, D., Koch, J., Leimbach, M., Levesque, A., Madeddu, S., Malik, A., Merfort, A., Merfort, L., Odenweller, A., Pehl, M., Pietzcker, R. C., Piontek, F., Rauner, S., Rodrigues, R., Rottoli, M., Schreyer, F., Schultes, A., Soergel, B., Soergel, D., Strefler, J., Ueckerdt, F., Kriegler, E., and Luderer, G.: REMIND2.1: Transformation and innovation dynamics of the energy-economic system within climate and sustainability limits, *Geosci. Model Dev. Discuss.*, 1–50, <https://doi.org/10.5194/gmd-2021-85>, 2021.
- Bogdanov, D., and Breyer, C.: North-East Asian Super Grid for 100% renewable energy supply: Optimal mix of energy technologies for electricity, gas and heat supply options, *Energy Conversion and Management*, 112, 176–190, <https://doi.org/10.1016/j.enconman.2016.01.019>, 2016.
- Brown, T., Hörsch J., and Schlachtberger, D.: PyPSA: Python for power system Analysis, <https://doi.org/10.5334/jors.188>, 2017.
- Callaghan, M., Schleussner, C.-F., Nath, S., Lejeune, Q., Knutson, T. R., Reichstein, M., Hansen, G., Theokritoff, E., Andrijevic, M., Brecha, R. J., Hegarty, M., Jones, C., Lee, K., Lucas, A., van Maanen, N., Menke, I., Pfliegerer, P., Yesil, B., and Minx, J. C.: Machine-learning-based evidence and attribution mapping of 100,000 climate impact studies, *Nat. Clim. Change*, 11, 966–972, <https://doi.org/10.1038/s41558-021-01168-6>, 2021.
- Child, M., Kemfert, C., Bogdanov, D., and Breyer, C.: Flexible electricity generation, grid exchange and storage for the transition to a 100% renewable energy system in Europe, *Renewable Energy*, 139, 80–101, <https://doi.org/10.1016/j.renene.2019.02.077>, 2019.
- De Vita, A., Kielichowska, I., Mandatowa, P., Capros, P., Dimopoulou, E., Evangelopoulou, S., Fotiou, T., Kannavou, M., Siskos, P., Zazias, G., De Vos, L., Dadkhah, A., and Dekelver, G.: Technology pathways in decarbonisation scenarios, ASSET project, 2018.
- Henning H-M. and Palzer A.: A comprehensive model for the German electricity and heat sector in a future energy system with a dominant contribution from renewable energy technologies—Part I: Methodology. *Renew Sustain Energy Rev*; 30:1003–18. <https://doi.org/10.1016/J.RSER.2013.09.012>, 2014.



Hörsch, J., Hofmann F., Schlachtberger D., and Brown T.: PyPSA-eur: an open optimisation model of the European transmission system, *Energy Strategy Reviews*, 22, 207-215, <https://doi.org/10.1016/j.esr.2018.08.012>, 2018.

IEA: World Energy Outlook 2016, International Energy Agency, Paris, France, 2016.

IEA: Offshore Wind Outlook 2019, IEA, Paris, 2019.

IEA: World Energy Outlook 2020, IEA, Paris, 2020.

IEA PVPS: Trends in Photovoltaic applications, International Energy Agency, Paris, 2020.

Jenkins, J.D., and Sepulveda, N.A.: Enhanced decision support for a changing electricity landscape: the GenX configurable electricity resource capacity expansion model. MITEI-WP-2017-10. Available at: <http://energy.mit.edu/wp-content/uploads/2017/10/Enhanced-Decision-Support-for-a-Changing-Electricity-Landscape.pdf>, 2017.

Lazard: Lazard's Levelized cost of energy analysis-version 13.0, 2019.

Levesque, A., Pietzcker, R. C., Baumstark, L., De Stercke, S., Grübler, A., Luderer, G.: How much energy will buildings consume in 2100? A global perspective within a scenario framework, *Energy*, 148, 514-527, <https://doi.org/10.1016/j.energy.2018.01.139>, 2018.

Sgambatti Monteiro, A., Ramanarayanan, V., Abdelgawad, N., Alusiola, R. A., Anyaoha, K. E., Ardabili, S., Burgos, N., Cuevas Flores, M., Leone, E., Mosavi, A., Nguyen, M. A., Nikravan, M., Owusu, C. K., Castro Prieto, E. M., & Beltran Siñani, M. I. Sustainable Solutions for the Global South in a Post-Pandemic World. IASS Study, 2021.

Palzer A. and Henning H-M.: A comprehensive model for the German electricity and heat sector in a future energy system with a dominant contribution from renewable energy technologies – Part II: Results. *Renew Sustain Energy Rev*; 30:1019–34. <https://doi.org/10.1016/J.RSER.2013.11.032>, 2014(a).

Palzer, A. and Henning, H.-M.: A Future German Energy System with a Dominating Contribution from Renewable Energies: A Holistic Model Based on Hourly Simulation. *Energy Technology*, 2: 13-28. <https://doi.org/10.1002/ente.201300083>, 2014(b).

Prina, M.G., Manzolini, G., Moser, D., Nastasi, B., and Sparber, W.: Classification and challenges of bottom-up energy system models - A review, *Renewable and Sustainable Energy Reviews*, 129, 109917, <https://doi.org/10.1016/j.rser.2020.109917>, 2020.

Reuß, M., Grube, T., Robinius, M., Preuster, P., Wasserscheid, P., and Stolten, D.: Seasonal storage and alternative carriers: A flexible hydrogen supply chain model, *Appl. Energy*, 200, 290–302, <https://doi.org/10.1016/j.apenergy.2017.05.050>, 2017.

Ringkjøb, H.-K., Haugan, P. M. and Solbrekke, I. M.: A review of modelling tools for energy and electricity systems with large shares of variable renewables, *Renewable and Sustainable Energy Reviews*, 96, 440-459, <https://doi.org/10.1016/j.rser.2018.08.002>, 2018.

Schill, W.-P. and Zerrahn, A.: Long-run power storage requirements for high shares of renewables: Results and sensitivities, *Renew. Sustain. Energy Rev.*, 83, 156–171, <https://doi.org/10.1016/j.rser.2017.05.205>, 2018.

Schmidt, O., Melchior, S., Hawkes, A., and Staffell, I.: Projecting the Future Levelized Cost of Electricity Storage Technologies, *Joule*, 3, 81–100, <https://doi.org/10.1016/j.joule.2018.12.008>, 2019.

Strefler, J., Kriegler, E., Bauer, N., Luderer, G., Pietzcker, R. C., Giannousakis, A., and Edenhofer, O.: Alternative carbon price trajectories can avoid excessive carbon removal, *Nat. Commun.*, 12,

<https://doi.org/10.1038/s41467-021-22211-2>, 2021.

Warszawski, L., Frieler, K., Huber, V., Piontek, F., Serdeczny, O., Schewe, J.: The Inter-Sectoral Impact Model Intercomparison Project (ISI-MIP): Project framework, *Proc. Natl. Acad. Sci.* 111, 3228–3232,

<https://doi.org/10.1073/pnas.1312330110>, 2014.

Zerrahn, A. and Schill, W.-P.: Long-run power storage requirements for high shares of renewables: review and a new model, *Renew. Sustain. Energy Rev.*, 79, 1518–1534, <https://doi.org/10.1016/j.rser.2016.11.098>, 2017.

Zerrahn, A., Schill, W.-P., and Kemfert, C.: On the economics of electrical storage for variable renewable energy sources, *Eur. Econ. Rev.*, 108, 259–279, <https://doi.org/10.1016/j.euroecorev.2018.07.004>, 2018.
